# Supplementary material for: Aryl Hydrocarbon Receptor-Dependent inductions of omega-3 and omega-6 polyunsaturated fatty acid metabolism act inversely on tumor progression
Source: Springer Nature journal article supplement (doi:10.1038/s41598-020-64146-6), 2020-05-12
Supplement: 41598_2020_64146_MOESM2_ESM.pdf [file 41598_2020_64146_MOESM2_ESM.pdf]

## Supplementary Material

Aryl Hydrocarbon Receptor-Dependent inductions of omega-3 and omega-6 polyunsaturated fatty acid metabolism act inversely on tumor progression

Sara Huerta-Yepez<sup>1</sup>, Ana Tirado-Rodriguez<sup>1</sup>, Mayra R. Montecillo-Aguado<sup>2</sup>, Jun Yang<sup>3</sup>, Bruce D. Hammock<sup>3</sup> and \*Oliver Hankinson<sup>1,4</sup>

<sup>1</sup>Department of Pathology & Laboratory Medicine, University of California, Los Angeles, CA 90095

<sup>2</sup>Research Unit of Oncology Diseases. Hospital Infantil de Mexico, Federico Gomez. Mexico City, Mexico.

<sup>3</sup>Department of Entomology and Comprehensive Cancer Center, University of California, Davis, CA 95616

<sup>4</sup>Molecular Toxicology Interdepartmental Program and Department of Environmental Health Sciences, University of California, Los Angeles, CA 90095

Address correspondence to:

\*Oliver Hankinson, Department of Pathology & Laboratory Medicine, UCLA Medical Center, Center for the Health Sciences Box 951732, Los Angeles, CA 90095-1732, [ohank@mednet.ucla.edu](mailto:ohank@mednet.ucla.edu)

**Supplementary Table S1.** Compositions of experimental diets

|                                 | <b>TD.140429</b> | <b>TD.140428</b> | <b>TD.150321</b> |
|---------------------------------|------------------|------------------|------------------|
| <u>Component</u>                | g/Kg             | g/Kg             | g/Kg             |
| Casein                          | 200.0            | 200.0            | 200.0            |
| L-Cystine                       | 3.0              | 3.0              | 3.0              |
| Corn Starch                     | 397.486          | 397.486          | 397.486          |
| Maltodextrin                    | 132.0            | 132.0            | 132.0            |
| Sucrose                         | 100.0            | 100.0            | 100.0            |
| Coconut Oil                     | 49.175           | 49.175           | 49.175           |
| Fish Oil                        | 14.3             | --               | 1.22             |
| Corn Oil                        | 6.525            | 20.825           | 19.605           |
| Cellulose                       | 50.0             | 50.0             | 50.0             |
| Mineral Mix, AIN-93G-MX (94046) | 35.0             | 35.0             | 35.0             |
| Vitamin Mix, AIN-93-VX (94047)  | 10.0             | 10.0             | 10.0             |
| Choline Bitartrate              | 2.5              | 2.5              | 2.5              |
| TBHQ, antioxidant               | 0.014            | 0.014            | 0.014            |

**Supplementary Table S2.** Levels of individual PUFA in organs of mice 24 days after initiation of feeding of the diets. (mol/gm tissue)

| Lung FA | Normal chow | Diet 21     | Diet 28    | Diet 29   |
|---------|-------------|-------------|------------|-----------|
| LA      | 21056 ±4168 | 17152 ±3742 | 21827±3501 | 9657±743  |
| EDA     | 310 ±19     | 184 ±19     | 176 ±14    | 113 ± 8   |
| ARA     | 5152 ± 29   | 4959 ±208   | 5439 ±167  | 2623 ±113 |
| ALA     | 697 ±181    | 161 ±32     | 215 ±49    | 163 ±17   |
| EPA     | 238 ±16     | 230 ±31     | 102 ±2     | 806 ±31   |
| DPA     | 884 ±22     | 421 ±26     | 217 ±16    | 1714 ±83  |
| DHA     | 3020 ±11    | 2601 ±69    | 1857 ±96   | 5079 ±266 |

| Liver FA | Normal chow | Diet 21     | Diet 28    | Diet 29    |
|----------|-------------|-------------|------------|------------|
| LA       | 16547 ±266  | 13305 ±2025 | 13252 ±500 | 4740 ±2323 |
| EDA      | 246 ±7      | 199 ±36     | 194 ±27    | 4893 ±2294 |
| ARA      | 9315 ±176   | 10463 ±1993 | 11638 ±583 | 1718 ±879  |
| ALA      | 354 ±9      | 116 ±47     | 117 ±39    | 103 ±19    |
| EPA      | 386 ±32     | 140 ±41     | 120 ±45    | 2031 ±528  |
| DPA      | 461 ±18     | 238 ±19     | 151 ±12    | 875 ±218   |
| DHA      | 5264 ±144   | 6075 ±692   | 4314 ±181  | 7745 ±2006 |

| Skin FA | Normal chow  | Diet 21      | Diet 28     | Diet 29     |
|---------|--------------|--------------|-------------|-------------|
| LA      | 53574 ±12379 | 64548 ±20233 | 42456 ±6440 | 31598 ±3835 |
| EDA     | 309 ±75      | 464 ±27      | 351 ±129    | 214 ±15     |
| ARA     | 923 ±128     | 977 ±252     | 1441 ±323   | 639 ±105    |
| ALA     | 2225 ±524    | 1734 ±80     | 1086 ±302   | 921 ±140    |
| EPA     | 82 ±15       | 134 ±5       | 208 ±140    | 539 ±154    |
| DPA     | 211 ±35      | 243 ±23      | 159 ±60     | 521 ±86     |
| DHA     | 625 ±60      | 984 ±139     | 524 ±102    | 1653 ±268   |

**Supplementary Table S3.** Levels of oxylipins in Hepa1-GFP-derived tumors, in lungs and in livers.

Please refer to the separate excel file

**Supplementary Table S4.** The volumes and weights of tumors at resection. (A: Hepa1-GFP tumors, B to E: LLC tumors).

**A**

| $\omega 6$ | No. mice | Tumor volume at resection tumor | p value | Weight tumor at resection tumor | p value |
|------------|----------|---------------------------------|---------|---------------------------------|---------|
| -TCDD+TPPU | 9        | 1930 $\pm$ 362                  | 0.5     | 0.8 $\pm$ 0.4                   | 0.9     |
| +TCDD+TPPU | 8        | 2172 $\pm$ 755)                 |         | 0.9 $\pm$ 0.5                   |         |

**B**

| $\omega 3$ | No. Mice | Tumor Volume at resection tumor | p value | Weight tumor at resection tumor | p value |
|------------|----------|---------------------------------|---------|---------------------------------|---------|
| -TCDD+TPPU | 46       | 3020 $\pm$ 100                  | 0.6     | 1.5 $\pm$ 0.06                  | 0.8     |
| +TCDD+TPPU | 50       | 2963 $\pm$ 74                   |         | 1.5 $\pm$ 0.09                  |         |
| -TCDD-TPPU | 16       | 2982 $\pm$ 178                  | 0.7     | 1.6 $\pm$ 0.08                  | 0.08    |
| +TCDD-TPPU | 22       | 3067 $\pm$ 117                  |         | 1.3 $\pm$ 0.10                  |         |

**C**

| $\omega 6$ | No. Mice | Tumor Volume at resection tumor | p value | Weight tumor at resection tumor | p value |
|------------|----------|---------------------------------|---------|---------------------------------|---------|
| -TCDD+TPPU | 21       | 2477 $\pm$ 71                   | 0.6     | 1.9 $\pm$ 0.07                  | 0.4     |
| +TCDD+TPPU | 22       | 2443 $\pm$ 228                  |         | 1.8 $\pm$ 0.08                  |         |
| -TCDD-TPPU | 19       | 2504 $\pm$ 101                  | 0.7     | 1.9 $\pm$ 0.08                  | 0.5     |
| +TCDD-TPPU | 19       | 2753 $\pm$ 107                  |         | 1.9 $\pm$ 0.08                  |         |

**D**

| $\text{♀} \omega 3$ | No. Mice | Tumor Volume at resection tumor | p value | Weight tumor at resection tumor | p value |
|---------------------|----------|---------------------------------|---------|---------------------------------|---------|
| -TCDD+TPPU          | 18       | 3624 $\pm$ 134                  | 0.5     | 2.0 $\pm$ 0.09                  | 0.7     |
| +TCDD+TPPU          | 16       | 3803 $\pm$ 181                  |         | 2.0 $\pm$ 0.08                  |         |
| -TCDD-TPPU          | 14       | 3726 $\pm$ 273                  | 0.6     | 2.1 $\pm$ 0.09                  | 0.1     |
| +TCDD-TPPU          | 11       | 3612 $\pm$ 210                  |         | 2.0 $\pm$ 0.08                  |         |

**E**

| $\text{♀} \omega 6$ | No. Mice | Tumor Volume at resection tumor | p value | Weight tumor at resection tumor | p value |
|---------------------|----------|---------------------------------|---------|---------------------------------|---------|
| -TCDD+TPPU          | 18       | 2405 $\pm$ 81                   | 0.9     | 1.6 $\pm$ 0.05                  | 0.4     |
| +TCDD+TPPU          | 16       | 2404 $\pm$ 106                  |         | 1.5 $\pm$ 0.1                   |         |
| -TCDD-TPPU          | 14       | 2342 $\pm$ 82                   | 0.5     | 1.6 $\pm$ 0.06                  | 0.1     |
| +TCDD-TPPU          | 11       | 2275 $\pm$ 52                   |         | 1.4 $\pm$ 0.1                   |         |

**Supplementary Table S5. Sequences of RT-PCR primers.**

|                                                                                                                |                                                                          |
|----------------------------------------------------------------------------------------------------------------|--------------------------------------------------------------------------|
| CYP1A1                                                                                                         | Forward (F)-AGAGCACTACAGGACATTTGAG<br>Reverse (R)-CCAAAGAGGTCCAAAACAATCG |
| CYP1A2                                                                                                         | F-TGGAGCTGGCTTTGACACAGT<br>R-GCCATGTCACAAGTAGCAAAATG                     |
| CYP1B1                                                                                                         | F-ACCAGAAGTCCTCCTACCAAGAGA<br>R-GCCTCATCCAGGGCTATAAAGG                   |
| EPHX2                                                                                                          | F-GGTTACCATCCTGGTCCACA<br>R-TGTGTCCCTGTGACCTTCTC                         |
| AHR primers (proprietary sequences) were purchased from Qiagen, Valencia, CA (catalog # PPM03973F-200)         |                                                                          |
| Tubulin (TUBD1) mRNA was determined by Taqman Assays using TUBD1 probe from Applied Biosystems (Mm00444851_m1) |                                                                          |
| 36B4                                                                                                           | F-GGACCCGAGAAGACCTCCTT<br>R-GCACATCACTCAGAATTTCAA                        |
| EPHX2 (Digital droplet PCR primers)                                                                            | F-GCCAGTGATGAGACAGGTTT<br>R-GCTGAGGTTGGGATCTTCTG                         |
| 36B4 (Digital droplet PCR primers)                                                                             | F-ACCGCCTGGTTCTCCTATAA<br>R-AAGACGATGTCACTCCAACG                         |

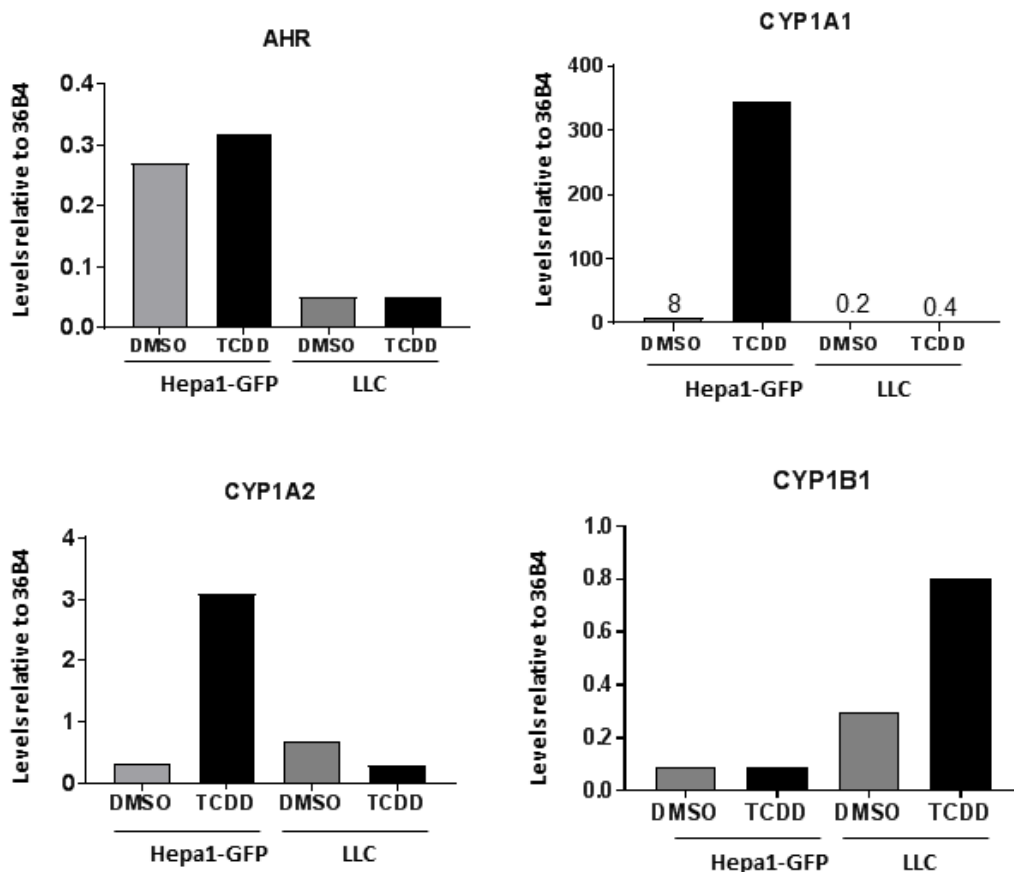

**Supplementary Figure S1.** AHR and CYP1 mRNA expression in Hepa1-GFP and LLC cells treated for 3 days with 1 nM TCDD or 0.1% DMSO (vehicle). The values are represented relative to the constitutively expressed ribosomal protein 36B4, are the means of duplicate determinations in each case, and representative of at least three independent determinations.

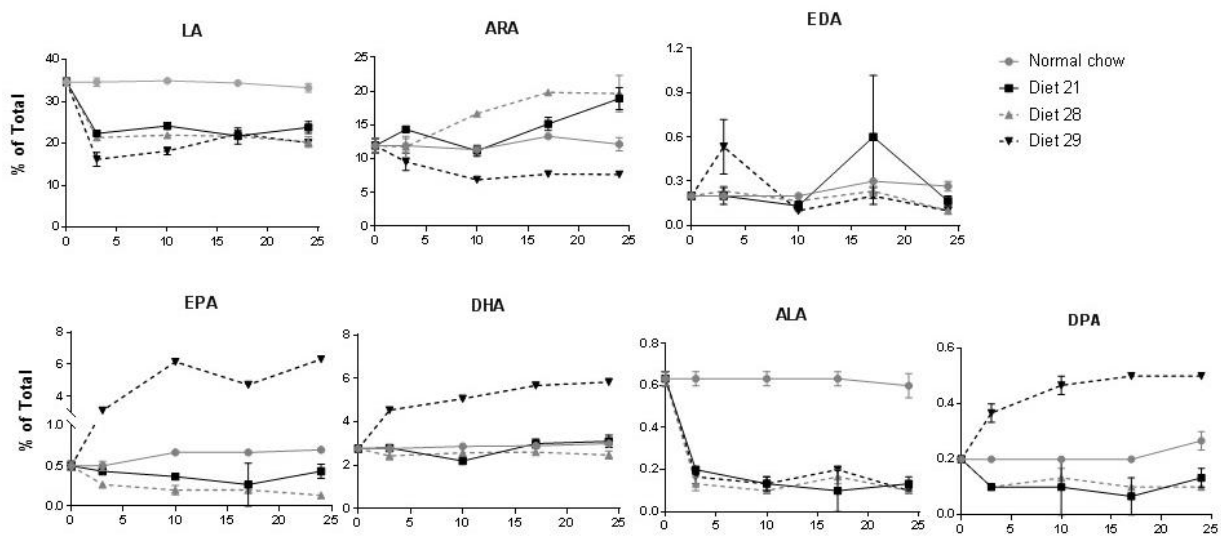

**Supplementary Figure S2.** Levels of individual PUFA in plasma of mice after initiation of feeding of the diets. EDA is Eicosadienoic acid and DPA is Docosapentenoic acid.



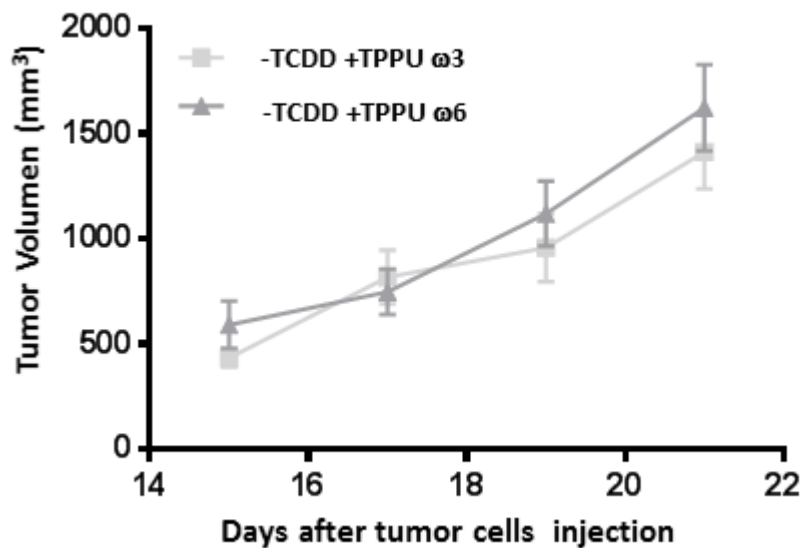

**Supplementary Figure S3.** Tumor growth rates of LLC-derived tumors in mice fed diet 29 ω3-rich and ω6-rich diet 21 in the absence of TCDD. There were no significant differences at any time point. A representative experiment of four independent experiments is shown.

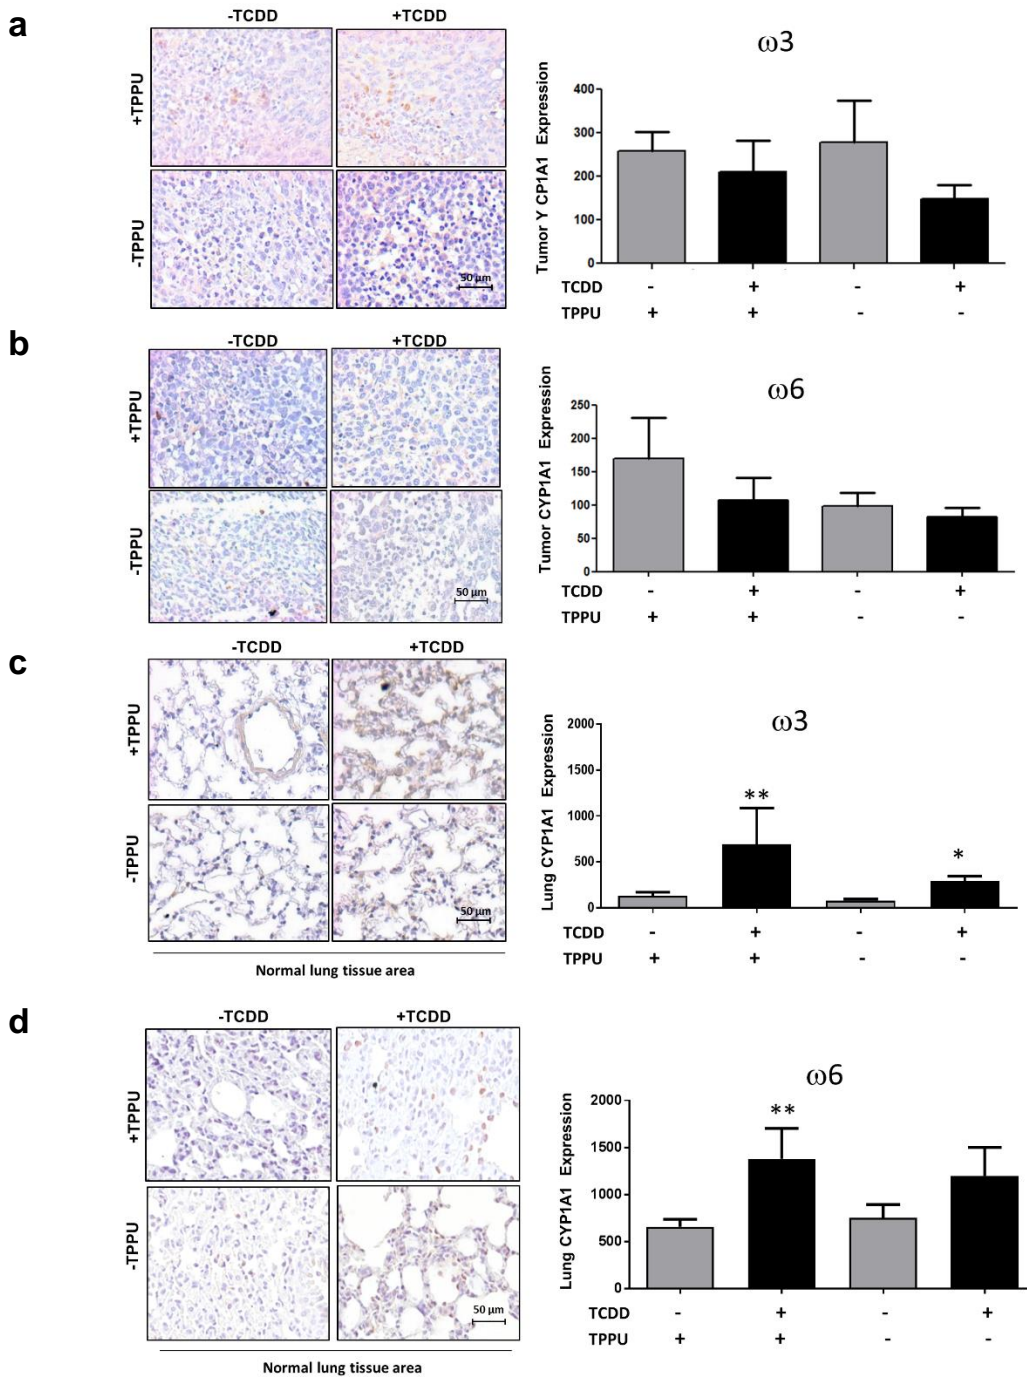

**Supplementary Figure S4.** CYP1A1 protein levels in LLC-derived tumors from male mice fed the  $\omega$ 3-rich (A) or  $\omega$ 6-rich (B) diets, and in non-metastatic segments of the lungs of male mice fed with the  $\omega$ 3-rich (C) and  $\omega$ 6-rich (D) diets.

**a**

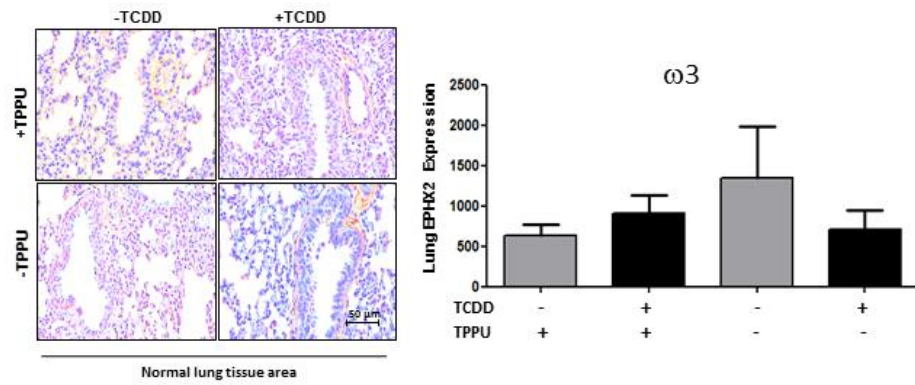

**b**

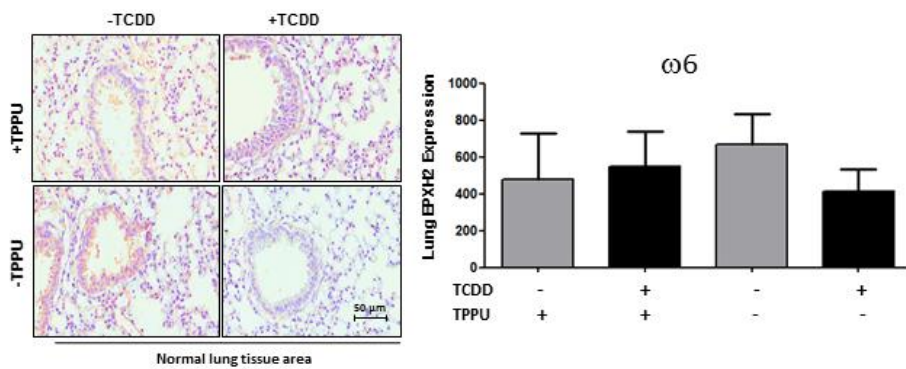

Supplementary Figure S5. EPHX2 levels in lung.
